# Supplementary material for: Retinoids Promote Mouse Bone Marrow-Derived Macrophage Differentiation and Efferocytosis via Upregulating Bone Morphogenetic Protein-2 and Smad3
Source: MDPI journal article supplement (doi:10.3390/cells11182928), 2022-09-19
Supplement: s1 [file s1]

**Supplementary Table S1.** List of 357 transcripts which were significantly upregulated in BMDMs exposed to 1  $\mu$ M DHR during the last 2 days of their differentiation compared to DMSO treatment (based on at least 1.5-fold change and corrected p value<0.05).

| <b>Corr. p val.</b> | <b>FC</b> | <b>Gene symbol</b> | <b>Gene title</b>                                                      |
|---------------------|-----------|--------------------|------------------------------------------------------------------------|
| 8.9E-08             | 249.6     | Bmp2               | bone morphogenetic protein 2                                           |
| 1.2E-06             | 212.5     | Camkk1             | calcium/calmodulin-dependent protein kinase kinase 1, alpha            |
| 1.2E-06             | 193.0     | Mmp9               | matrix metalloproteinase 9                                             |
| 7.1E-06             | 168.1     | Rarb               | retinoic acid receptor, beta                                           |
| 2.1E-05             | 70.6      | B230378P21Rik      | RIKEN cDNA B230378P21 gene                                             |
| 1.6E-07             | 51.5      | Cd38               | CD38 antigen                                                           |
| 3.1E-05             | 45.9      | Slc12a5            | solute carrier family 12, member 5                                     |
| 7.4E-05             | 37.5      | Chst15             | carbohydrate (N-acetylgalactosamine 4-sulfate 6-O) sulfotransferase 15 |
| 2.0E-07             | 35.4      | Gm13431            | predicted gene 13431                                                   |
| 4.7E-06             | 28.7      | Col14a1            | collagen, type XIV, alpha 1                                            |
| 2.9E-06             | 28.5      | Cxcl14             | chemokine (C-X-C motif) ligand 14                                      |
| 4.9E-08             | 26.8      | Pram1              | PML-RAR alpha-regulated adaptor molecule 1                             |
| 4.3E-05             | 26.2      | Kcnip3             | Kv channel interacting protein 3, calsenilin                           |
| 1.8E-08             | 23.9      | Hic1               | hypermethylated in cancer 1                                            |
| 5.1E-04             | 22.8      | Tspan18            | tetraspanin 18                                                         |
| 7.8E-05             | 22.7      | Fgf1               | fibroblast growth factor 1                                             |
| 3.2E-06             | 21.0      | Art2a-ps           | ADP-ribosyltransferase 2a, pseudogene                                  |
| 8.0E-08             | 18.9      | Csn3               | casein kappa                                                           |
| 7.5E-05             | 15.9      | Pde1c              | phosphodiesterase 1C                                                   |
| 3.7E-07             | 15.6      | Prtn3              | proteinase 3                                                           |
| 1.8E-04             | 14.8      | Cyp26b1            | cytochrome P450, family 26, subfamily b, polypeptide 1                 |
| 1.4E-07             | 14.0      | Ednrb              | endothelin receptor type B                                             |
| 1.3E-10             | 11.2      | Ptgs1              | prostaglandin-endoperoxide synthase 1                                  |
| 1.6E-03             | 10.8      | Fam20a             | family with sequence similarity 20, member A                           |
| 5.2E-08             | 10.7      | Bcl2a1b            | B cell leukemia/lymphoma 2 related protein A1b                         |
| 1.7E-04             | 10.4      | Plxna4             | plexin A4                                                              |
| 8.7E-07             | 9.9       | Col4a5             | collagen, type IV, alpha 5                                             |
| 7.4E-05             | 9.5       | BC035044           | cDNA sequence BC035044                                                 |
| 1.3E-06             | 9.3       | BC005764           | cDNA sequence BC005764                                                 |
| 1.1E-04             | 9.0       | Mdfi               | MyoD family inhibitor                                                  |
| 5.1E-04             | 8.9       | Gpr35              | G protein-coupled receptor 35                                          |
| 1.3E-07             | 8.9       | Ccl6               | chemokine (C-C motif) ligand 6                                         |
| 1.4E-06             | 8.4       | Pkd1l2             | polycystic kidney disease 1 like 2                                     |

|         |     |               |                                                                |
|---------|-----|---------------|----------------------------------------------------------------|
| 2.2E-03 | 8.4 | P2rx1         | purinergic receptor P2X, ligand-gated ion channel, 1           |
| 4.5E-09 | 8.2 | Acp5          | acid phosphatase 5, tartrate resistant                         |
| 4.3E-06 | 7.9 | Asb4          | ankyrin repeat and SOCS box-containing 4                       |
| 2.3E-05 | 7.7 | Hs3st3a1      | heparan sulfate (glucosamine) 3-O-sulfotransferase 3A1         |
| 8.8E-09 | 7.6 | Card11        | caspase recruitment domain family, member 11                   |
| 1.2E-07 | 7.6 | Rbpms         | RNA binding protein gene with multiple splicing                |
| 9.2E-04 | 7.4 | Il1a          | interleukin 1 alpha                                            |
| 1.0E-07 | 7.3 | Ifitm6        | interferon induced transmembrane protein 6                     |
| 2.0E-05 | 7.3 | Hs3st3b1      | heparan sulfate (glucosamine) 3-O-sulfotransferase 3B1         |
| 9.9E-03 | 7.0 | Col4a6        | collagen, type IV, alpha 6                                     |
| 1.6E-07 | 6.9 | Fcna          | ficolin A                                                      |
| 5.0E-03 | 6.9 | Gm10567       | predicted gene 10567                                           |
| 1.1E-04 | 6.7 | Sell          | selectin, lymphocyte                                           |
| 4.6E-06 | 6.6 | Ryr1          | ryanodine receptor 1, skeletal muscle                          |
| 6.9E-07 | 6.5 | Il21r         | interleukin 21 receptor                                        |
| 2.4E-09 | 6.4 | Ltbp3         | latent transforming growth factor beta binding protein 3       |
| 2.6E-05 | 6.1 | Cfhr2         | complement factor H-related 2                                  |
| 1.8E-03 | 6.0 | Gm4788        | predicted gene 4788                                            |
| 3.7E-05 | 6.0 | Prss50        | protease, serine, 50                                           |
| 3.9E-09 | 5.9 | Gm20507       | predicted gene 20507                                           |
| 3.6E-07 | 5.8 | Mfng          | MFNG O-fucosylpeptide 3-beta-N-acetylglucosaminyltransferase   |
| 2.0E-03 | 5.8 | 2010320O07Rik | RIKEN cDNA 2010320O07 gene                                     |
| 1.7E-02 | 5.7 | Foxq1         | forkhead box Q1                                                |
| 1.5E-04 | 5.6 | Clec1a        | C-type lectin domain family 1, member a                        |
| 2.0E-02 | 5.1 | Ddit4l        | DNA-damage-inducible transcript 4-like                         |
| 2.0E-06 | 5.1 | Socs2         | suppressor of cytokine signaling 2                             |
| 1.6E-03 | 5.0 | BC021767      | cDNA sequence BC021767                                         |
| 3.2E-07 | 4.9 | Pde2a         | phosphodiesterase 2A, cGMP-stimulated                          |
| 7.1E-06 | 4.9 | Gm16332       | predicted gene 16332                                           |
| 7.6E-06 | 4.8 | Enpp4         | ectonucleotide pyrophosphatase/phosphodiesterase 4             |
| 1.6E-05 | 4.7 | Treml2        | triggering receptor expressed on myeloid cells-like 2          |
| 4.0E-08 | 4.7 | Bcl2a1d       | B cell leukemia/lymphoma 2 related protein A1d                 |
| 1.8E-06 | 4.5 | Bcl2a1a       | B cell leukemia/lymphoma 2 related protein A1a                 |
| 2.1E-07 | 4.5 | Hivep2        | human immunodeficiency virus type I enhancer binding protein 2 |
| 1.5E-06 | 4.5 | Fam102a       | family with sequence similarity 102, member A                  |
| 4.8E-03 | 4.5 | Cgn           | cingulin                                                       |
| 6.3E-07 | 4.5 | Cfh           | complement component factor h                                  |

|         |     |               |                                                    |
|---------|-----|---------------|----------------------------------------------------|
| 9.1E-07 | 4.4 | Vegfa         | vascular endothelial growth factor A               |
| 6.7E-03 | 4.3 | B630019A10Rik | RIKEN cDNA B630019A10 gene                         |
| 1.1E-06 | 4.3 | Cd24a         | CD24a antigen                                      |
| 4.4E-03 | 4.2 | Art2b         | ADP-ribosyltransferase 2b                          |
| 1.7E-03 | 4.2 | Gm16268       | predicted gene 16268                               |
| 3.0E-04 | 4.2 | Fabp7         | fatty acid binding protein 7, brain                |
| 1.0E-07 | 4.1 | Smad3         | SMAD family member 3                               |
| 3.8E-04 | 4.1 | Aldh1a2       | aldehyde dehydrogenase family 1, subfamily A2      |
| 3.4E-04 | 4.1 | Grtp1         | GH regulated TBC protein 1                         |
| 1.4E-04 | 4.0 | A430108G06Rik | RIKEN cDNA A430108G06 gene                         |
| 2.6E-09 | 3.9 | 2510009E07Rik | RIKEN cDNA 2510009E07 gene                         |
| 2.1E-07 | 3.9 | Ikbke         | inhibitor of kappaB kinase epsilon                 |
| 5.2E-03 | 3.9 | Wnk2          | WNK lysine deficient protein kinase 2              |
| 2.3E-06 | 3.9 | Epas1         | endothelial PAS domain protein 1                   |
| 5.7E-04 | 3.9 | Flywch2       | FLYWCH family member 2                             |
| 2.5E-06 | 3.8 | Gm22          | predicted gene 22                                  |
| 8.8E-09 | 3.8 | Dtx4          | deltex 4 homolog (Drosophila)                      |
| 8.6E-03 | 3.8 | Enpp5         | ectonucleotide pyrophosphatase/phosphodiesterase 5 |
| 5.4E-05 | 3.7 | Nes           | nestin                                             |
| 5.4E-07 | 3.7 | Gda           | guanine deaminase                                  |
| 4.4E-03 | 3.6 | Marco         | macrophage receptor with collagenous structure     |
| 1.4E-05 | 3.6 | Pilrb1        | paired immunoglobulin-like type 2 receptor beta 1  |
| 1.3E-07 | 3.6 | Rab20         | RAB20, member RAS oncogene family                  |
| 1.2E-06 | 3.6 | Cp            | ceruloplasmin                                      |
| 2.4E-03 | 3.5 | Sytl3         | synaptotagmin-like 3                               |
| 1.5E-02 | 3.5 | Gm11724       | predicted gene 11724                               |
| 8.8E-07 | 3.5 | Apoc2         | apolipoprotein C-II                                |
| 9.4E-04 | 3.4 | Onecut3       | one cut domain, family member 3                    |
| 1.7E-03 | 3.4 | Gm15635       | predicted gene 15635                               |
| 1.1E-02 | 3.4 | Gpr31b        | G protein-coupled receptor 31, D17Leh66b region    |
| 1.1E-03 | 3.3 | Phf11         | PHD finger protein 11                              |
| 8.6E-05 | 3.3 | Hbegf         | heparin-binding EGF-like growth factor             |
| 3.9E-03 | 3.3 | Ascl2         | achaete-scute complex homolog 2 (Drosophila)       |
| 4.9E-09 | 3.3 | Anxa3         | annexin A3                                         |
| 8.4E-07 | 3.2 | Pilrb2        | paired immunoglobulin-like type 2 receptor beta 2  |
| 1.0E-03 | 3.2 | Gm13337       | predicted gene 13337                               |
| 1.1E-03 | 3.2 | Stab2         | stabilin 2                                         |
| 9.8E-07 | 3.2 | Klhl12        | kelch-like 12 (Drosophila)                         |
| 1.2E-05 | 3.2 | Gm16010       | predicted gene 16010                               |
| 4.9E-06 | 3.1 | Stat4         | signal transducer and activator of transcription 4 |
| 2.9E-03 | 3.1 | Ccdc48        | coiled-coil domain containing 48                   |
| 1.4E-02 | 3.1 | Smtnl2        | smoothelin-like 2                                  |

|         |     |               |                                                              |
|---------|-----|---------------|--------------------------------------------------------------|
| 2.3E-05 | 3.1 | Gm11464       | predicted gene 11464                                         |
| 8.9E-08 | 3.1 | Tagap         | T cell activation Rho GTPase activating protein              |
| 1.1E-02 | 3.0 | Gsta4         | glutathione S-transferase, alpha 4                           |
| 6.7E-03 | 3.0 | Asb2          | ankyrin repeat and SOCS box-containing 2                     |
| 4.9E-08 | 3.0 | Fam20c        | family with sequence similarity 20, member C                 |
| 3.0E-03 | 3.0 | 1700024P16Rik | RIKEN cDNA 1700024P16 gene                                   |
| 4.1E-04 | 3.0 | Htra1         | HtrA serine peptidase 1                                      |
| 3.0E-03 | 3.0 | Gm15395       | predicted gene 15395                                         |
| 1.4E-06 | 3.0 | Cd97          | CD97 antigen                                                 |
| 4.5E-03 | 2.9 | Ak3l2-ps      | adenylate kinase 3-like 2, pseudogene                        |
| 6.5E-08 | 2.9 | Osgin1        | oxidative stress induced growth inhibitor 1                  |
| 3.3E-05 | 2.9 | Npm2          | nucleophosmin/nucleoplasmin 2                                |
| 2.5E-06 | 2.8 | Palm          | paralemmin                                                   |
| 5.2E-03 | 2.8 | Egln3         | EGL nine homolog 3 (C. elegans)                              |
| 1.9E-04 | 2.8 | 5031425F14Rik | RIKEN cDNA 5031425F14 gene                                   |
| 8.3E-04 | 2.8 | Tubb3         | tubulin, beta 3 class III                                    |
| 4.9E-07 | 2.8 | Clec7a        | C-type lectin domain family 7, member a                      |
| 2.7E-04 | 2.8 | Prrg4         | proline rich Gla (G-carboxyglutamic acid) 4 (transmembrane)  |
| 1.2E-03 | 2.8 | Akap2         | A kinase (PRKA) anchor protein 2                             |
| 6.7E-03 | 2.8 | A530084C06Rik | RIKEN cDNA A530084C06 gene                                   |
| 4.0E-04 | 2.7 | Gm20459       | predicted gene 20459                                         |
| 3.8E-03 | 2.7 | Aldh1l2       | aldehyde dehydrogenase 1 family, member L2                   |
| 6.1E-06 | 2.7 | Ccnd2         | cyclin D2                                                    |
| 5.2E-06 | 2.7 | Tmc8          | transmembrane channel-like gene family 8                     |
| 5.5E-03 | 2.7 | Gm6904        | predicted gene 6904                                          |
| 1.4E-07 | 2.7 | Clec2i        | C-type lectin domain family 2, member i                      |
| 2.2E-07 | 2.7 | Baiap2        | brain-specific angiogenesis inhibitor 1-associated protein 2 |
| 1.5E-03 | 2.7 | Osbp2         | oxysterol binding protein 2                                  |
| 1.6E-04 | 2.7 | Vsig8         | V-set and immunoglobulin domain containing 8                 |
| 3.5E-07 | 2.7 | Sdc1          | syndecan 1                                                   |
| 1.3E-05 | 2.7 | AA467197      | expressed sequence AA467197                                  |
| 1.3E-02 | 2.6 | Gpr124        | G protein-coupled receptor 124                               |
| 1.0E-07 | 2.6 | Cd53          | CD53 antigen                                                 |
| 1.2E-07 | 2.6 | Gsta3         | glutathione S-transferase, alpha 3                           |
| 3.7E-07 | 2.6 | Ltc4s         | leukotriene C4 synthase                                      |
| 3.1E-07 | 2.6 | B430306N03Rik | RIKEN cDNA B430306N03 gene                                   |
| 3.9E-04 | 2.6 | H2afy2        | H2A histone family, member Y2                                |
| 1.2E-03 | 2.6 | Gm4902        | predicted gene 4902                                          |
| 1.3E-06 | 2.6 | Rap1gap2      | RAP1 GTPase activating protein 2                             |
| 1.6E-03 | 2.6 | Plat          | plasminogen activator, tissue                                |

|         |     |               |                                                                 |
|---------|-----|---------------|-----------------------------------------------------------------|
| 1.6E-04 | 2.6 | Gas2          | growth arrest specific 2                                        |
| 8.1E-05 | 2.6 | Cmtm8         | CKLF-like MARVEL transmembrane domain containing 8              |
| 7.1E-04 | 2.6 | Syt8          | synaptotagmin VIII                                              |
| 1.8E-02 | 2.6 | Rpl31-ps17    | ribosomal protein L31, pseudogene 17                            |
| 1.9E-03 | 2.6 | Corin         | corin                                                           |
| 1.6E-06 | 2.5 | Gm4980        | predicted gene 4980                                             |
| 3.2E-06 | 2.5 | Slco2b1       | solute carrier organic anion transporter family, member 2b1     |
| 1.2E-08 | 2.5 | 1810011H11Rik | RIKEN cDNA 1810011H11 gene                                      |
| 1.6E-05 | 2.5 | Ddah2         | dimethylarginine dimethylaminohydrolase 2                       |
| 1.8E-02 | 2.5 | 4833418N02Rik | RIKEN cDNA 4833418N02 gene                                      |
| 7.9E-07 | 2.5 | Slc40a1       | solute carrier family 40 (iron-regulated transporter), member 1 |
| 5.2E-06 | 2.5 | Sox4          | SRY-box containing gene 4                                       |
| 1.5E-02 | 2.5 | Ak4           | adenylate kinase 4                                              |
| 1.5E-04 | 2.5 | Palld         | palladin, cytoskeletal associated protein                       |
| 4.9E-08 | 2.4 | Parvg         | parvin, gamma                                                   |
| 5.2E-06 | 2.4 | Myh10         | myosin, heavy polypeptide 10, non-muscle                        |
| 4.4E-06 | 2.4 | Dnmt3l        | DNA (cytosine-5-)-methyltransferase 3-like                      |
| 1.5E-05 | 2.4 | Gm20658       | predicted gene 20658                                            |
| 6.2E-05 | 2.4 | Rasgrp2       | RAS, guanyl releasing protein 2                                 |
| 4.2E-06 | 2.4 | Aifm2         | apoptosis-inducing factor, mitochondrion-associated 2           |
| 4.6E-05 | 2.4 | Bspsy         | B-box and SPRY domain containing                                |
| 1.4E-02 | 2.4 | Cand2         | cullin-associated and neddylation-dissociated 2 (putative)      |
| 7.2E-07 | 2.4 | Mt2           | metallothionein 2                                               |
| 4.3E-07 | 2.4 | Fcgr4         | Fc receptor, IgG, low affinity IV                               |
| 1.1E-09 | 2.4 | Mcart1        | mitochondrial carrier triple repeat 1                           |
| 2.2E-03 | 2.4 | Rap1gap       | Rap1 GTPase-activating protein                                  |
| 2.7E-06 | 2.4 | Rai14         | retinoic acid induced 14                                        |
| 2.2E-04 | 2.4 | Mdm1          | transformed mouse 3T3 cell double minute 1                      |
| 7.7E-04 | 2.4 | Gm9252        | predicted gene 9252                                             |
| 5.5E-04 | 2.4 | Gm6377        | predicted gene 6377                                             |
| 2.5E-06 | 2.3 | Ndst1         | N-deacetylase/N-sulfotransferase (heparan glucosaminyl) 1       |
| 1.3E-08 | 2.3 | Tbxas1        | thromboxane A synthase 1, platelet                              |
| 1.2E-04 | 2.3 | Vangl2        | vang-like 2 (van gogh, Drosophila)                              |
| 1.2E-05 | 2.3 | St3gal5       | ST3 beta-galactoside alpha-2,3-sialyltransferase 5              |
| 1.8E-06 | 2.3 | Spsb4         | splA/ryanodine receptor domain and SOCS box containing 4        |

|         |     |               |                                                            |
|---------|-----|---------------|------------------------------------------------------------|
| 1.6E-07 | 2.3 | Ubxn8         | UBX domain protein 8                                       |
| 2.6E-04 | 2.3 | Soat2         | sterol O-acyltransferase 2                                 |
| 5.4E-06 | 2.3 | Tpt1-ps5      | tumor protein, translationally-controlled, pseudogene 5    |
| 1.3E-02 | 2.3 | Smo           | smoothened homolog (Drosophila)                            |
| 3.8E-08 | 2.3 | Rhoc          | ras homolog gene family, member C                          |
| 1.6E-04 | 2.3 | E430024P14Rik | RIKEN cDNA E430024P14 gene                                 |
| 8.4E-06 | 2.3 | Gpc1          | glypican 1                                                 |
| 2.1E-06 | 2.3 | Dchs1         | dachsous 1 (Drosophila)                                    |
| 2.2E-07 | 2.3 | Traf3ip3      | TRAF3 interacting protein 3                                |
| 1.0E-07 | 2.3 | Hdac9         | histone deacetylase 9                                      |
| 7.0E-03 | 2.3 | Mettl21c      | methyltransferase like 21C                                 |
| 1.1E-02 | 2.3 | Gm8724        | predicted pseudogene 8724                                  |
| 2.2E-05 | 2.3 | Ifitm3        | interferon induced transmembrane protein 3                 |
| 5.8E-05 | 2.3 | D330020A13RIK | Putative uncharacterized protein                           |
| 7.0E-09 | 2.3 | Gsr           | glutathione reductase                                      |
| 4.0E-06 | 2.3 | Ccr12         | chemokine (C-C motif) receptor-like 2                      |
| 4.5E-08 | 2.3 | Fam117a       | family with sequence similarity 117, member A              |
| 3.2E-03 | 2.2 | Cxcr5         | chemokine (C-X-C motif) receptor 5                         |
| 3.5E-07 | 2.2 | Map4k1        | mitogen-activated protein kinase kinase kinase 1           |
| 7.7E-03 | 2.2 | Aldh5a1       | aldehyde dehydrogenase family 5, subfamily A1              |
| 2.5E-06 | 2.2 | Prom1         | prominin 1                                                 |
| 1.0E-04 | 2.2 | Gm11521       | predicted gene 11521                                       |
| 9.4E-08 | 2.2 | Nrip1         | nuclear receptor interacting protein 1                     |
| 1.9E-07 | 2.2 | Runx3         | runt related transcription factor 3                        |
| 6.9E-08 | 2.2 | Neurl3        | neuralized homolog 3 homolog (Drosophila)                  |
| 5.1E-06 | 2.1 | Rhou          | ras homolog gene family, member U                          |
| 1.0E-03 | 2.1 | AF529169      | cDNA sequence AF529169                                     |
| 4.1E-05 | 2.1 | Samsn1        | SAM domain, SH3 domain and nuclear localization signals, 1 |
| 1.8E-02 | 2.1 | Gm15701       | predicted gene 15701                                       |
| 3.2E-06 | 2.1 | Pitpnc1       | phosphatidylinositol transfer protein, cytoplasmic 1       |
| 2.0E-08 | 2.1 | Phf15         | PHD finger protein 15                                      |
| 4.4E-04 | 2.1 | H1fx          | H1 histone family, member X                                |
| 3.8E-04 | 2.1 | Cd1d1         | CD1d1 antigen                                              |
| 4.1E-03 | 2.1 | March9        | membrane-associated ring finger (C3HC4) 9                  |
| 6.5E-08 | 2.1 | Kpna4         | karyopherin (importin) alpha 4                             |
| 2.8E-03 | 2.1 | Gm14027       | predicted gene 14027                                       |
| 5.8E-03 | 2.0 | C330011M18Rik | RIKEN cDNA C330011M18 gene                                 |
| 1.4E-07 | 2.0 | Prdx5         | peroxiredoxin 5                                            |
| 2.3E-03 | 2.0 | 0610010O12Rik | RIKEN cDNA 0610010O12 gene                                 |

|         |     |               |                                                                                    |
|---------|-----|---------------|------------------------------------------------------------------------------------|
| 1.7E-04 | 2.0 | Bank1         | B cell scaffold protein with ankyrin repeats 1                                     |
| 2.1E-03 | 2.0 | Galnt3        | UDP-N-acetyl-alpha-D-galactosamine:polypeptide N-acetylgalactosaminyltransferase 3 |
| 1.8E-05 | 2.0 | Gm7901        | predicted gene 7901                                                                |
| 5.3E-05 | 2.0 | Fbxo32        | F-box protein 32                                                                   |
| 1.5E-06 | 2.0 | Padi4         | peptidyl arginine deiminase, type IV                                               |
| 7.0E-03 | 2.0 | Dmwd          | dystrophia myotonica-containing WD repeat motif                                    |
| 1.0E-07 | 2.0 | Gatm          | glycine amidinotransferase (L-arginine:glycine amidinotransferase)                 |
| 8.4E-05 | 2.0 | Gm17114       | predicted gene 17114                                                               |
| 1.7E-03 | 2.0 | 1700062I23Rik | RIKEN cDNA 1700062I23 gene                                                         |
| 4.9E-04 | 2.0 | Thbs1         | thrombospondin 1                                                                   |
| 2.7E-03 | 2.0 | Ccdc148       | coiled-coil domain containing 148                                                  |
| 6.7E-04 | 2.0 | Rec8          | REC8 homolog (yeast)                                                               |
| 1.9E-03 | 2.0 | Olfr1417      | olfactory receptor 1417                                                            |
| 4.5E-04 | 2.0 | Pilra         | paired immunoglobulin-like type 2 receptor alpha                                   |
| 4.1E-06 | 2.0 | Insig1        | insulin induced gene 1                                                             |
| 8.7E-07 | 2.0 | Itpr3         | inositol 1,4,5-triphosphate receptor 3                                             |
| 1.1E-03 | 1.9 | Prr5          | proline rich 5 (renal)                                                             |
| 5.3E-08 | 1.9 | Ninj1         | ninjurin 1                                                                         |
| 5.6E-08 | 1.9 | Tpt1          | tumor protein, translationally-controlled 1                                        |
| 2.7E-04 | 1.9 | Kif19a        | kinesin family member 19A                                                          |
| 1.6E-08 | 1.9 | Tpt1-ps3      | tumor protein, translationally-controlled, pseudogene 3                            |
| 2.0E-04 | 1.9 | Irf4          | interferon regulatory factor 4                                                     |
| 2.0E-05 | 1.9 | Arrdc3        | arrestin domain containing 3                                                       |
| 3.3E-04 | 1.9 | Ctse          | cathepsin E                                                                        |
| 1.4E-04 | 1.9 | Clic5         | chloride intracellular channel 5                                                   |
| 1.9E-07 | 1.9 | Tpt1-ps6      | tumor protein, translationally-controlled, pseudogene 6                            |
| 1.5E-08 | 1.9 | Kif3a         | kinesin family member 3A                                                           |
| 3.2E-06 | 1.9 | Phgdh         | 3-phosphoglycerate dehydrogenase                                                   |
| 6.8E-07 | 1.9 | Gadd45a       | growth arrest and DNA-damage-inducible 45 alpha                                    |
| 8.5E-04 | 1.9 | Acy1          | aminoacylase 1                                                                     |
| 8.2E-04 | 1.9 | Per2          | period homolog 2 (Drosophila)                                                      |
| 4.4E-05 | 1.9 | Fam65b        | family with sequence similarity 65, member B                                       |
| 1.4E-06 | 1.9 | Tagap1        | T cell activation GTPase activating protein 1                                      |
| 1.3E-09 | 1.9 | Slc7a5        | solute carrier family 7 (cationic amino acid transporter, y+ system), member 5     |
| 7.1E-07 | 1.9 | Slc30a9       | solute carrier family 30 (zinc transporter), member 9                              |
| 5.7E-08 | 1.9 | Chac1         | ChaC, cation transport regulator 1                                                 |
| 8.1E-03 | 1.8 | Gm11201       | predicted gene 11201                                                               |

|         |     |               |                                                                              |
|---------|-----|---------------|------------------------------------------------------------------------------|
| 3.8E-09 | 1.8 | Tubb6         | tubulin, beta 6 class V                                                      |
| 3.3E-03 | 1.8 | Gm5540        | predicted pseudogene 5540                                                    |
| 4.8E-05 | 1.8 | Prkcb         | protein kinase C, beta                                                       |
| 1.1E-09 | 1.8 | St6gal1       | beta galactoside alpha 2,6 sialyltransferase 1                               |
| 1.8E-06 | 1.8 | Cgnl1         | cingulin-like 1                                                              |
| 9.0E-07 | 1.8 | Scn1b         | sodium channel, voltage-gated, type I, beta                                  |
| 9.5E-04 | 1.8 | Eps8          | epidermal growth factor receptor pathway substrate 8                         |
| 2.2E-08 | 1.8 | Man1a         | mannosidase 1, alpha                                                         |
| 7.0E-07 | 1.8 | Mov10         | Moloney leukemia virus 10                                                    |
| 1.5E-05 | 1.8 | Dip2c         | DIP2 disco-interacting protein 2 homolog C (Drosophila)                      |
| 6.9E-06 | 1.8 | Acsf2         | acyl-CoA synthetase family member 2                                          |
| 4.1E-07 | 1.8 | Rnaset2a      | ribonuclease T2A                                                             |
| 2.7E-06 | 1.8 | Fam125b       | family with sequence similarity 125, member B                                |
| 8.3E-05 | 1.8 | Gadd45g       | growth arrest and DNA-damage-inducible 45 gamma                              |
| 8.8E-09 | 1.8 | Rasgrp3       | RAS, guanyl releasing protein 3                                              |
| 6.9E-06 | 1.8 | Jdp2          | Jun dimerization protein 2                                                   |
| 1.4E-06 | 1.8 | Cmah          | cytidine monophospho-N-acetylneuraminic acid hydroxylase                     |
| 1.5E-08 | 1.8 | Fam134b       | family with sequence similarity 134, member B                                |
| 8.7E-06 | 1.8 | Siglec5       | sialic acid binding Ig-like lectin 5                                         |
| 1.1E-08 | 1.7 | P2rx7         | purinergic receptor P2X, ligand-gated ion channel, 7                         |
| 1.9E-07 | 1.7 | Hcfc2         | host cell factor C2                                                          |
| 9.8E-06 | 1.7 | Agpat9        | 1-acylglycerol-3-phosphate O-acyltransferase 9                               |
| 1.6E-07 | 1.7 | Lfng          | LFNG O-fucosylpeptide 3-beta-N-acetylglucosaminyltransferase                 |
| 2.5E-06 | 1.7 | Slc1a4        | solute carrier family 1 (glutamate/neutral amino acid transporter), member 4 |
| 7.9E-05 | 1.7 | Susd1         | sushi domain containing 1                                                    |
| 6.2E-06 | 1.7 | Zfp238        | zinc finger protein 238                                                      |
| 8.7E-07 | 1.7 | Itch          | itchy, E3 ubiquitin protein ligase                                           |
| 3.1E-07 | 1.7 | Rnaset2b      | ribonuclease T2B                                                             |
| 7.4E-03 | 1.7 | Arhgap32      | Rho GTPase activating protein 32                                             |
| 2.0E-04 | 1.7 | Klhl38        | kelch-like 38 (Drosophila)                                                   |
| 1.4E-05 | 1.7 | Hrh1          | histamine receptor H1                                                        |
| 3.1E-03 | 1.7 | 4930455G09Rik | RIKEN cDNA 4930455G09 gene                                                   |
| 1.8E-05 | 1.7 | Ets2          | E26 avian leukemia oncogene 2, 3' domain                                     |
| 1.4E-03 | 1.7 | Tnnt1         | troponin T1, skeletal, slow                                                  |
| 1.4E-04 | 1.7 | Mex3b         | mex3 homolog B (C. elegans)                                                  |
| 9.4E-06 | 1.7 | Trf           | transferrin                                                                  |



|         |     |               |                                                                                                                   |
|---------|-----|---------------|-------------------------------------------------------------------------------------------------------------------|
| 6.1E-03 | 1.7 | Gm14719       | predicted gene 14719                                                                                              |
| 1.4E-05 | 1.7 | Pdpf          | pancreatic progenitor cell differentiation and proliferation factor homolog (zebrafish)RIKEN cDNA 2700038C09 gene |
| 5.6E-05 | 1.7 | Siglec1       | sialic acid binding Ig-like lectin 1, sialoadhesin                                                                |
| 5.3E-07 | 1.7 | Gm20425       | predicted gene 20425                                                                                              |
| 3.6E-07 | 1.7 | Plk2          | polo-like kinase 2                                                                                                |
| 1.8E-05 | 1.6 | Ccr1          | chemokine (C-C motif) receptor 1                                                                                  |
| 1.5E-06 | 1.6 | Atf5          | activating transcription factor 5                                                                                 |
| 2.6E-03 | 1.6 | 4933427G23Rik | RIKEN cDNA 4933427G23 gene                                                                                        |
| 1.3E-05 | 1.6 | Dhdh          | dihydrodiol dehydrogenase (dimeric)                                                                               |
| 2.2E-08 | 1.6 | Tnfaip8       | tumor necrosis factor, alpha-induced protein 8                                                                    |
| 1.2E-05 | 1.6 | Sap30         | sin3 associated polypeptide                                                                                       |
| 5.1E-07 | 1.6 | Nup210        | nucleoporin 210                                                                                                   |
| 2.1E-06 | 1.6 | Rnf141        | ring finger protein 141                                                                                           |
| 1.2E-06 | 1.6 | Atxn2         | ataxin 2                                                                                                          |
| 4.6E-07 | 1.6 | 4931406C07Rik | RIKEN cDNA 4931406C07 gene                                                                                        |
| 7.8E-03 | 1.6 | Wnt6          | wingless-related MMTV integration site 6                                                                          |
| 6.7E-08 | 1.6 | Asns          | asparagine synthetase                                                                                             |
| 3.3E-05 | 1.6 | Hoxb4         | homeobox B4                                                                                                       |
| 2.3E-07 | 1.6 | Il16          | interleukin 16                                                                                                    |
| 2.0E-04 | 1.6 | Grap          | GRB2-related adaptor protein                                                                                      |
| 7.1E-03 | 1.6 | Spp1          | secreted phosphoprotein 1                                                                                         |
| 2.8E-04 | 1.6 | Nhs12         | NHS-like 2                                                                                                        |
| 7.8E-04 | 1.6 | Fzd1          | frizzled homolog 1 (Drosophila)                                                                                   |
| 6.2E-08 | 1.6 | Tgm2          | transglutaminase 2, C polypeptide                                                                                 |
| 3.7E-05 | 1.6 | Slc25a23      | solute carrier family 25 (mitochondrial carrier; phosphate carrier), member 23                                    |
| 1.6E-05 | 1.6 | Ly86          | lymphocyte antigen 86                                                                                             |
| 6.9E-04 | 1.6 | Morn4         | MORN repeat containing 4                                                                                          |
| 1.2E-05 | 1.6 | Enc1          | ectodermal-neural cortex 1                                                                                        |
| 2.6E-06 | 1.6 | Zfp503        | zinc finger protein 503                                                                                           |
| 2.9E-06 | 1.6 | Zdhhc14       | zinc finger, DHHC domain containing 14                                                                            |
| 4.4E-04 | 1.6 | Zfp438        | zinc finger protein 438                                                                                           |
| 5.6E-07 | 1.6 | Myo7a         | myosin VIIA                                                                                                       |
| 6.2E-06 | 1.6 | 4930481A15Rik | RIKEN cDNA 4930481A15 gene                                                                                        |
| 1.0E-07 | 1.6 | Slc2a6        | solute carrier family 2 (facilitated glucose transporter), member 6                                               |
| 1.2E-03 | 1.6 | Plcx2         | phosphatidylinositol-specific phospholipase C, X domain containing 2                                              |
| 8.2E-07 | 1.6 | Kitl          | kit ligand                                                                                                        |
| 5.2E-03 | 1.6 | Axl           | AXL receptor tyrosine kinase                                                                                      |

|         |     |               |                                                                  |
|---------|-----|---------------|------------------------------------------------------------------|
| 2.5E-07 | 1.6 | Dusp6         | dual specificity phosphatase 6                                   |
| 1.4E-03 | 1.6 | Tmem42        | transmembrane protein 42                                         |
| 9.5E-08 | 1.5 | Ccl2          | chemokine (C-C motif) ligand 2                                   |
| 3.4E-04 | 1.5 | Bex1          | brain expressed gene 1                                           |
| 1.5E-06 | 1.5 | Pde7a         | phosphodiesterase 7A                                             |
| 1.5E-07 | 1.5 | Hs6st1        | heparan sulfate 6-O-sulfotransferase 1                           |
| 1.1E-06 | 1.5 | Tgs1          | trimethylguanosine synthase homolog (S. cerevisiae)              |
| 1.9E-03 | 1.5 | Gm16363       | predicted gene 16363                                             |
| 1.0E-06 | 1.5 | Cdc42ep2      | CDC42 effector protein (Rho GTPase binding) 2                    |
| 6.7E-07 | 1.5 | A530064D06Rik | RIKEN cDNA A530064D06 gene                                       |
| 1.4E-04 | 1.5 | Cd36          | CD36 antigen                                                     |
| 2.7E-03 | 1.5 | Mthfd2l       | methylenetetrahydrofolate dehydrogenase (NADP+ dependent) 2-like |
| 7.4E-05 | 1.5 | Arap2         | ArfGAP with RhoGAP domain, ankyrin repeat and PH domain 2        |
| 1.7E-06 | 1.5 | Ccdc88b       | coiled-coil domain containing 88B                                |
| 5.8E-09 | 1.5 | Cnrip1        | cannabinoid receptor interacting protein 1                       |
| 5.7E-03 | 1.5 | Bach2         | BTB and CNC homology 2                                           |
| 1.0E-04 | 1.5 | Tecpr2        | tectonin beta-propeller repeat containing 2                      |
| 2.0E-08 | 1.5 | Ehd1          | EH-domain containing 1                                           |
| 4.0E-04 | 1.5 | Tmem141       | transmembrane protein 141                                        |
| 8.5E-03 | 1.5 | Adat2         | adenosine deaminase, tRNA-specific 2                             |
| 1.5E-07 | 1.5 | Trib3         | tribbles homolog 3 (Drosophila)                                  |

**Supplementary Table S2.** List of 424 transcripts which were significantly downregulated in BMDMs exposed to 1  $\mu$ M DHR during the last 2 days of their differentiation compared to DMSO treatment (based on at least 1.5-fold change and corrected p value<0.05).

| Corr. p val. | FC    | Gene symbol | Gene title                                                                  |
|--------------|-------|-------------|-----------------------------------------------------------------------------|
| 1.2E-08      | -23.4 | Olfml3      | olfactomedin-like 3                                                         |
| 2.9E-04      | -16.5 | Nptx1       | neuronal pentraxin 1                                                        |
| 1.8E-07      | -14.8 | Cd276       | CD276 antigen                                                               |
| 5.9E-04      | -9.8  | Slc6a4      | solute carrier family 6 (neurotransmitter transporter, serotonin), member 4 |
| 7.7E-07      | -9.2  | Gp5         | glycoprotein 5 (platelet)                                                   |
| 1.5E-04      | -9.0  | Gm10134     | predicted gene 10134                                                        |
| 2.5E-03      | -8.0  | Mtap2       | microtubule-associated protein 2                                            |
| 1.9E-06      | -8.0  | Gata1       | GATA binding protein 1                                                      |
| 5.7E-03      | -8.0  | Kcnj16      | potassium inwardly-rectifying channel, subfamily J, member 16               |
| 5.0E-03      | -7.6  | Pcsk1       | proprotein convertase subtilisin/kexin type 1                               |

|         |      |               |                                                              |
|---------|------|---------------|--------------------------------------------------------------|
| 1.8E-05 | -7.4 | Gucy1b3       | guanylate cyclase 1, soluble, beta 3                         |
| 6.5E-06 | -7.2 | Ehd3          | EH-domain containing 3                                       |
| 4.8E-06 | -7.1 | Clu           | clusterin                                                    |
| 5.9E-04 | -6.9 | Cd207         | CD207 antigen                                                |
| 3.3E-05 | -6.5 | F2rl2         | coagulation factor II (thrombin) receptor-like 2             |
| 4.5E-08 | -6.2 | Myct1         | myc target 1                                                 |
| 1.1E-04 | -6.2 | Atp2b4        | ATPase, Ca <sup>++</sup> transporting, plasma membrane 4     |
| 1.3E-05 | -6.1 | Gucy1a3       | guanylate cyclase 1, soluble, alpha 3                        |
| 4.5E-05 | -5.8 | Kcnj5         | potassium inwardly-rectifying channel, subfamily J, member 5 |
| 5.0E-05 | -5.8 | Cd226         | CD226 antigen                                                |
| 4.0E-06 | -5.5 | Pde3a         | phosphodiesterase 3A, cGMP inhibited                         |
| 1.5E-02 | -5.5 | Tmem246       | transmembrane protein 246                                    |
| 5.2E-07 | -5.4 | Gbgt1         | globoside alpha-1,3-N-acetylgalactosaminyltransferase 1      |
| 9.1E-05 | -5.3 | Cd300e        | CD300e antigen                                               |
| 8.8E-06 | -5.3 | Gp6           | glycoprotein 6 (platelet)                                    |
| 5.7E-07 | -5.3 | Snca          | synuclein, alpha                                             |
| 4.5E-07 | -4.8 | Ppbp          | pro-platelet basic protein                                   |
| 9.6E-07 | -4.7 | Sdpr          | serum deprivation response                                   |
| 7.2E-07 | -4.7 | Nrgn          | neurogranin                                                  |
| 1.6E-05 | -4.6 | Faim3         | Fas apoptotic inhibitory molecule 3                          |
| 6.3E-04 | -4.6 | Gm16033       | predicted gene 16033                                         |
| 4.2E-04 | -4.6 | Gm16282       | predicted gene 16282                                         |
| 2.9E-06 | -4.6 | Cxcl5         | chemokine (C-X-C motif) ligand 5                             |
| 9.3E-03 | -4.5 | Rep15         | RAB15 effector protein                                       |
| 1.4E-05 | -4.4 | Cd244         | CD244 natural killer cell receptor 2B4                       |
| 3.5E-06 | -4.4 | AU023871      | expressed sequence AU023871                                  |
| 3.1E-04 | -4.4 | Bex6          | brain expressed gene 6                                       |
| 1.2E-04 | -4.3 | Ly6a          | lymphocyte antigen 6 complex, locus A                        |
| 9.3E-03 | -4.3 | Gm11545       | predicted gene 11545                                         |
| 5.1E-07 | -4.2 | Npas4         | neuronal PAS domain protein 4                                |
| 1.9E-03 | -4.2 | C530008M17Rik | RIKEN cDNA C530008M17 gene                                   |
| 1.1E-06 | -4.2 | Adam19        | a disintegrin and metallopeptidase domain 19 (meltrin beta)  |
| 3.1E-07 | -4.2 | Tesc          | tescalcin                                                    |
| 2.0E-06 | -4.2 | Itga2b        | integrin alpha 2b                                            |
| 7.1E-07 | -4.2 | Spint1        | serine protease inhibitor, Kunitz type 1                     |
| 3.5E-04 | -4.1 | Kif26b        | kinesin family member 26B                                    |
| 5.2E-04 | -4.1 | Gm1564        | predicted gene 1564                                          |
| 1.5E-02 | -4.1 | Ms4a4b        | membrane-spanning 4-domains, subfamily A, member 4B          |

|         |      |               |                                                                  |
|---------|------|---------------|------------------------------------------------------------------|
| 3.3E-04 | -4.1 | Penk          | preproenkephalin                                                 |
| 2.7E-08 | -4.1 | Prg2          | proteoglycan 2, bone marrow                                      |
| 8.8E-06 | -4.1 | Spata13       | spermatogenesis associated 13                                    |
| 2.5E-06 | -4.0 | Col18a1       | collagen, type XVIII, alpha 1                                    |
| 1.8E-03 | -3.9 | Lyzl4         | lysozyme-like 4                                                  |
| 2.6E-07 | -3.9 | Alox12        | arachidonate 12-lipoxygenase                                     |
| 2.8E-05 | -3.8 | Syn3          | synapsin III                                                     |
| 2.1E-06 | -3.8 | Rab27b        | RAB27b, member RAS oncogene family                               |
| 3.0E-07 | -3.7 | Ahrr          | aryl-hydrocarbon receptor repressor                              |
| 3.2E-03 | -3.7 | St8sia1       | ST8 alpha-N-acetyl-neuraminide alpha-2,8-sialyltransferase 1     |
| 4.1E-03 | -3.7 | Cspg4         | chondroitin sulfate proteoglycan 4                               |
| 1.9E-05 | -3.7 | Mmrn1         | multimerin 1                                                     |
| 6.1E-06 | -3.7 | Ciita         | class II transactivator                                          |
| 1.0E-04 | -3.7 | Clec4b1       | C-type lectin domain family 4, member b1                         |
| 6.6E-05 | -3.6 | Grap2         | GRB2-related adaptor protein 2                                   |
| 4.8E-03 | -3.6 | Mapk13        | mitogen-activated protein kinase 13                              |
| 5.8E-04 | -3.6 | Fcrls         | Fc receptor-like S, scavenger receptor                           |
| 1.9E-02 | -3.6 | Ypel4         | yippee-like 4 (Drosophila)                                       |
| 9.5E-04 | -3.6 | Ocstamp       | osteoclast stimulatory transmembrane protein                     |
| 6.7E-03 | -3.6 | Gm16034       | predicted gene 16034                                             |
| 7.2E-07 | -3.5 | Ngp           | neutrophilic granule protein                                     |
| 1.5E-06 | -3.5 | Mefv          | Mediterranean fever                                              |
| 8.7E-06 | -3.5 | Clec4a1       | C-type lectin domain family 4, member a1                         |
| 7.3E-03 | -3.5 | Gcm2          | glial cells missing homolog 2 (Drosophila)                       |
| 1.3E-05 | -3.4 | Ccr7          | chemokine (C-C motif) receptor 7                                 |
| 1.5E-02 | -3.4 | 4930562C15Rik | RIKEN cDNA 4930562C15 gene                                       |
| 1.0E-02 | -3.3 | Syt13         | synaptotagmin XIII                                               |
| 1.1E-06 | -3.3 | Gnaz          | guanine nucleotide binding protein, alpha z subunit              |
| 1.6E-07 | -3.3 | Angptl2       | angiopoietin-like 2                                              |
| 1.2E-04 | -3.2 | Fhl1          | four and a half LIM domains 1                                    |
| 1.1E-05 | -3.2 | H2-Ab1        | histocompatibility 2, class II antigen A, beta 1                 |
| 2.4E-03 | -3.2 | Rhcg          | Rhesus blood group-associated C glycoprotein                     |
| 9.7E-03 | -3.2 | Slc36a2       | solute carrier family 36 (proton/amino acid symporter), member 2 |
| 2.8E-06 | -3.2 | Ache          | acetylcholinesterase                                             |
| 1.1E-05 | -3.2 | Siglech       | sialic acid binding Ig-like lectin H                             |
| 2.9E-04 | -3.2 | Ch25h         | cholesterol 25-hydroxylase                                       |
| 3.7E-05 | -3.2 | H2-Aa         | histocompatibility 2, class II antigen A, alpha                  |
| 3.6E-06 | -3.2 | Diras2        | DIRAS family, GTP-binding RAS-like 2                             |
| 1.2E-07 | -3.1 | Rnd3          | Rho family GTPase 3                                              |
| 2.8E-05 | -3.1 | H2-Eb2        | histocompatibility 2, class II antigen E beta2                   |

|         |      |               |                                                                                                       |
|---------|------|---------------|-------------------------------------------------------------------------------------------------------|
| 4.3E-07 | -3.1 | Rasgrp4       | RAS guanyl releasing protein 4                                                                        |
| 1.0E-06 | -3.1 | Egr3          | early growth response 3                                                                               |
| 9.1E-03 | -3.1 | Klrb1c        | killer cell lectin-like receptor subfamily B member 1C                                                |
| 1.3E-05 | -3.1 | Cd74          | CD74 antigen (invariant polypeptide of major histocompatibility complex, class II antigen-associated) |
| 6.1E-03 | -3.1 | Gm13520       | predicted gene 13520                                                                                  |
| 1.5E-07 | -3.1 | Clec4a2       | C-type lectin domain family 4, member a2                                                              |
| 7.9E-05 | -3.1 | Alox5         | arachidonate 5-lipoxygenase                                                                           |
| 1.1E-04 | -3.0 | Nhedc2        | Na <sup>+</sup> /H <sup>+</sup> exchanger domain containing 2                                         |
| 2.7E-05 | -3.0 | Kalrn         | kalirin, RhoGEF kinase                                                                                |
| 1.2E-05 | -3.0 | L1cam         | L1 cell adhesion molecule                                                                             |
| 4.4E-05 | -3.0 | Cyp2s1        | cytochrome P450, family 2, subfamily s, polypeptide 1                                                 |
| 1.2E-05 | -3.0 | Pdgfb         | platelet derived growth factor, B polypeptide                                                         |
| 1.9E-03 | -3.0 | I830012O16Rik | RIKEN cDNA I830012O16 gene                                                                            |
| 4.1E-07 | -3.0 | Gfi1b         | growth factor independent 1B                                                                          |
| 4.1E-06 | -3.0 | Fos           | FBJ osteosarcoma oncogene                                                                             |
| 1.1E-02 | -3.0 | Alox15        | arachidonate 15-lipoxygenase                                                                          |
| 9.3E-07 | -3.0 | Vcan          | versican                                                                                              |
| 1.4E-03 | -3.0 | Gprc5c        | G protein-coupled receptor, family C, group 5, member C                                               |
| 5.0E-06 | -3.0 | Vipr1         | vasoactive intestinal peptide receptor 1                                                              |
| 1.6E-04 | -3.0 | Tubb1         | tubulin, beta 1 class VI                                                                              |
| 2.6E-03 | -3.0 | Mctp2         | multiple C2 domains, transmembrane 2                                                                  |
| 3.0E-06 | -2.9 | Il10          | interleukin 10                                                                                        |
| 5.3E-05 | -2.9 | Clec4a4       | C-type lectin domain family 4, member a4                                                              |
| 7.8E-06 | -2.9 | Gm11771       | predicted gene 11771                                                                                  |
| 1.9E-05 | -2.9 | H2-Eb1        | histocompatibility 2, class II antigen E beta                                                         |
| 1.2E-08 | -2.9 | Lipn          | lipase, family member N                                                                               |
| 4.1E-03 | -2.9 | Gm10604       | predicted gene 10604                                                                                  |
| 8.8E-03 | -2.9 | Snord89       | small nucleolar RNA, C/D box 89                                                                       |
| 4.8E-03 | -2.9 | Dscam         | Down syndrome cell adhesion molecule                                                                  |
| 5.9E-03 | -2.9 | Gm8369        | predicted gene 8369                                                                                   |
| 5.1E-04 | -2.9 | Efr3b         | EFR3 homolog B (S. cerevisiae)                                                                        |
| 5.6E-03 | -2.9 | Fhod3         | formin homology 2 domain containing 3                                                                 |
| 1.5E-03 | -2.9 | Nap1l2        | nucleosome assembly protein 1-like 2                                                                  |
| 2.4E-05 | -2.8 | Pald1         | phosphatase domain containing, paladin 1                                                              |
| 2.6E-07 | -2.8 | Mmp8          | matrix metalloproteinase 8                                                                            |
| 1.1E-06 | -2.8 | Tgfbi         | transforming growth factor, beta induced                                                              |
| 2.0E-04 | -2.8 | Oas3          | 2'-5' oligoadenylate synthetase 3                                                                     |
| 1.8E-07 | -2.8 | Serpine2      | serine (or cysteine) peptidase inhibitor, clade E, member 2                                           |
| 1.7E-05 | -2.8 | Prr5l         | proline rich 5 like                                                                                   |

|         |      |               |                                                                                 |
|---------|------|---------------|---------------------------------------------------------------------------------|
| 6.0E-04 | -2.8 | Tshz3         | teashirt zinc finger family member 3                                            |
| 4.9E-04 | -2.8 | Ms4a4c        | membrane-spanning 4-domains, subfamily A, member 4C                             |
| 9.5E-05 | -2.7 | Samd14        | sterile alpha motif domain containing 14                                        |
| 1.4E-07 | -2.7 | Plec          | plectin                                                                         |
| 2.2E-05 | -2.7 | Egfr          | epidermal growth factor receptor                                                |
| 4.9E-05 | -2.6 | Scimp         | SLP adaptor and CSK interacting membrane protein                                |
| 5.4E-07 | -2.6 | Ms4a7         | membrane-spanning 4-domains, subfamily A, member 7                              |
| 4.2E-05 | -2.6 | Prkcq         | protein kinase C, theta                                                         |
| 1.1E-03 | -2.6 | Tas1r3        | taste receptor, type 1, member 3                                                |
| 2.4E-03 | -2.6 | Flrt3         | fibronectin leucine rich transmembrane protein 3                                |
| 3.5E-06 | -2.6 | Mmp13         | matrix metalloproteinase 13                                                     |
| 1.2E-05 | -2.6 | Gpr34         | G protein-coupled receptor 34                                                   |
| 6.0E-03 | -2.6 | Slc13a3       | solute carrier family 13 (sodium-dependent dicarboxylate transporter), member 3 |
| 1.8E-06 | -2.6 | Zfyve28       | zinc finger, FYVE domain containing 28                                          |
| 2.2E-05 | -2.6 | Ramp3         | receptor (calcitonin) activity modifying protein 3                              |
| 3.3E-03 | -2.5 | Kcne3         | potassium voltage-gated channel, Isk-related subfamily, gene 3                  |
| 1.2E-08 | -2.5 | Lmna          | lamin A                                                                         |
| 1.1E-05 | -2.5 | B3gnt5        | UDP-GlcNAc:betaGal beta-1,3-N-acetylglucosaminyltransferase 5                   |
| 2.3E-06 | -2.5 | Timp3         | tissue inhibitor of metalloproteinase 3                                         |
| 4.4E-07 | -2.5 | Havcr2        | hepatitis A virus cellular receptor 2                                           |
| 5.8E-03 | -2.5 | Ifit1         | interferon-induced protein with tetratricopeptide repeats 1                     |
| 1.6E-05 | -2.5 | Acap1         | ArfGAP with coiled-coil, ankyrin repeat and PH domains 1                        |
| 1.9E-02 | -2.5 | Apol9a        | apolipoprotein L 9a                                                             |
| 1.5E-03 | -2.5 | Fgf13         | fibroblast growth factor 13                                                     |
| 1.6E-02 | -2.5 | Gm11760       | predicted gene 11760                                                            |
| 1.8E-05 | -2.4 | Apol7c        | apolipoprotein L 7c                                                             |
| 8.2E-07 | -2.4 | Nr4a1         | nuclear receptor subfamily 4, group A, member 1                                 |
| 1.4E-03 | -2.4 | Gm15156       | predicted gene 15156                                                            |
| 6.7E-05 | -2.4 | Cbr2          | carbonyl reductase 2                                                            |
| 7.5E-06 | -2.4 | Gp9           | glycoprotein 9 (platelet)                                                       |
| 2.2E-03 | -2.4 | Ifit3         | interferon-induced protein with tetratricopeptide repeats 3                     |
| 7.8E-05 | -2.4 | 4931403E22Rik | RIKEN cDNA 4931403E22 gene                                                      |
| 1.8E-03 | -2.4 | Hpx           | hemopexin                                                                       |
| 7.8E-06 | -2.4 | Angptl4       | angiopoietin-like 4                                                             |
| 1.3E-05 | -2.4 | Cd300lg       | CD300 antigen like family member G                                              |

|         |      |               |                                                                                    |
|---------|------|---------------|------------------------------------------------------------------------------------|
| 1.6E-04 | -2.4 | Efna1         | ephrin A1                                                                          |
| 4.0E-03 | -2.4 | Mir27b        | microRNA 27b                                                                       |
| 2.8E-06 | -2.4 | Il18rap       | interleukin 18 receptor accessory protein                                          |
| 3.8E-03 | -2.3 | Wnt9a         | wingless-type MMTV integration site 9A                                             |
| 1.6E-03 | -2.3 | Tcte2         | t-complex-associated testis expressed 2                                            |
| 2.8E-05 | -2.3 | Fbln5         | fibulin 5                                                                          |
| 2.7E-04 | -2.3 | Elovl7        | ELOVL family member 7, elongation of long chain fatty acids (yeast)                |
| 3.8E-03 | -2.3 | Kcnk12        | potassium channel, subfamily K, member 12                                          |
| 1.6E-03 | -2.3 | Dgkg          | diacylglycerol kinase, gamma                                                       |
| 1.1E-03 | -2.3 | Sez6l2        | seizure related 6 homolog like 2                                                   |
| 3.1E-05 | -2.3 | Hpgd          | hydroxyprostaglandin dehydrogenase 15 (NAD)                                        |
| 5.7E-05 | -2.3 | Cx3cr1        | chemokine (C-X3-C) receptor 1                                                      |
| 1.6E-02 | -2.3 | Gm8428        | predicted gene 8428                                                                |
| 1.4E-06 | -2.3 | Ms4a6d        | membrane-spanning 4-domains, subfamily A, member 6D                                |
| 2.7E-06 | -2.3 | Trem1l        | triggering receptor expressed on myeloid cells-like 1                              |
| 8.4E-05 | -2.3 | Gm12291       | predicted gene 12291                                                               |
| 6.8E-03 | -2.3 | Npdc1         | neural proliferation, differentiation and control gene 1                           |
| 4.9E-07 | -2.3 | Trib1         | tribbles homolog 1 (Drosophila)                                                    |
| 3.0E-05 | -2.2 | Skint3        | selection and upkeep of intraepithelial T cells 3                                  |
| 2.4E-06 | -2.2 | Cd72          | CD72 antigen                                                                       |
| 3.5E-07 | -2.2 | Gp1bb         | glycoprotein Ib, beta polypeptide                                                  |
| 1.1E-03 | -2.2 | C430049B03Rik | RIKEN cDNA C430049B03 gene                                                         |
| 2.2E-06 | -2.2 | Mfsd2b        | major facilitator superfamily domain containing 2B                                 |
| 2.9E-05 | -2.2 | Galnt9        | UDP-N-acetyl-alpha-D-galactosamine:polypeptide N-acetylgalactosaminyltransferase 9 |
| 2.6E-09 | -2.2 | 2010002N04Rik | RIKEN cDNA 2010002N04 gene                                                         |
| 2.7E-04 | -2.2 | Ptrf          | polymerase I and transcript release factor                                         |
| 6.8E-05 | -2.2 | Spnb1         | spectrin beta 1                                                                    |
| 2.5E-04 | -2.2 | Ctla2a        | cytotoxic T lymphocyte-associated protein 2 alpha                                  |
| 1.9E-05 | -2.2 | Ms4a6b        | membrane-spanning 4-domains, subfamily A, member 6B                                |
| 1.0E-03 | -2.2 | Pcdh7         | protocadherin 7                                                                    |
| 1.2E-02 | -2.1 | Oasl2         | 2'-5' oligoadenylate synthetase-like 2                                             |
| 3.3E-05 | -2.1 | Ceacam19      | carcinoembryonic antigen-related cell adhesion molecule 19                         |
| 8.3E-07 | -2.1 | Tiam1         | T cell lymphoma invasion and metastasis 1                                          |
| 4.9E-04 | -2.1 | Ahr           | aryl-hydrocarbon receptor                                                          |
| 8.1E-04 | -2.1 | Nlrp1c        | NLR family, pyrin domain containing 1C                                             |
| 5.0E-05 | -2.1 | Ndr4          | N-myc downstream regulated gene 4                                                  |

|         |      |               |                                                                                               |
|---------|------|---------------|-----------------------------------------------------------------------------------------------|
| 2.6E-05 | -2.1 | Ndrp1         | N-myc downstream regulated gene 1                                                             |
| 1.2E-08 | -2.1 | Vim           | vimentin                                                                                      |
| 5.5E-03 | -2.1 | Ppic          | peptidylprolyl isomerase C                                                                    |
| 3.6E-06 | -2.1 | Pdpr          | podoplanin                                                                                    |
| 3.1E-06 | -2.1 | 4831426I19Rik | RIKEN cDNA 4831426I19 gene                                                                    |
| 4.2E-06 | -2.1 | Ms4a6c        | membrane-spanning 4-domains, subfamily A, member 6C                                           |
| 7.6E-03 | -2.1 | Adora3        | adenosine A3 receptor                                                                         |
| 8.5E-04 | -2.1 | Cd5l          | CD5 antigen-like                                                                              |
| 3.2E-03 | -2.1 | Rhbdf1        | rhomboid family 1 (Drosophila)                                                                |
| 5.2E-04 | -2.1 | Oas2          | 2'-5' oligoadenylate synthetase 2                                                             |
| 2.7E-06 | -2.1 | Olfm1         | olfactomedin 1                                                                                |
| 2.1E-08 | -2.1 | Clec4n        | C-type lectin domain family 4, member n                                                       |
| 8.4E-05 | -2.1 | Clec4a3       | C-type lectin domain family 4, member a3                                                      |
| 8.5E-06 | -2.1 | Adcy6         | adenylate cyclase 6                                                                           |
| 1.4E-03 | -2.1 | Fgfr1         | fibroblast growth factor receptor 1                                                           |
| 9.2E-03 | -2.1 | Hoxa1         | homeobox A1                                                                                   |
| 1.3E-06 | -2.1 | Gpr56         | G protein-coupled receptor 56                                                                 |
| 2.8E-04 | -2.1 | Boc           | biregional cell adhesion molecule-related/ down-regulated by oncogenes (Cdon) binding protein |
| 1.3E-04 | -2.1 | Rhoj          | ras homolog gene family, member J                                                             |
| 7.8E-03 | -2.1 | Cnih3         | cornichon homolog 3 (Drosophila)                                                              |
| 1.3E-09 | -2.1 | Capn2         | calpain 2                                                                                     |
| 6.3E-04 | -2.0 | Prune2        | prune homolog 2 (Drosophila)                                                                  |
| 2.4E-04 | -2.0 | Mmp14         | matrix metalloproteinase 14 (membrane-inserted)                                               |
| 8.2E-07 | -2.0 | Cd109         | CD109 antigen                                                                                 |
| 9.3E-04 | -2.0 | Cdk5r1        | cyclin-dependent kinase 5, regulatory subunit 1 (p35)                                         |
| 7.7E-04 | -2.0 | Pvr1l         | poliovirus receptor-related 1                                                                 |
| 4.0E-03 | -2.0 | Gm13966       | predicted gene 13966                                                                          |
| 7.3E-07 | -2.0 | S100a4        | S100 calcium binding protein A4                                                               |
| 1.8E-05 | -2.0 | Gpr141        | G protein-coupled receptor 141                                                                |
| 2.6E-03 | -2.0 | Cacnb3        | calcium channel, voltage-dependent, beta 3 subunit                                            |
| 1.6E-07 | -2.0 | Cytip         | cytohesin 1 interacting protein                                                               |
| 3.5E-05 | -2.0 | Itgal         | integrin alpha L                                                                              |
| 6.1E-04 | -2.0 | Nckap1        | NCK-associated protein 1                                                                      |
| 7.9E-07 | -2.0 | Dusp1         | dual specificity phosphatase 1                                                                |
| 5.1E-07 | -2.0 | Itgb3         | integrin beta 3                                                                               |
| 1.8E-04 | -2.0 | Gm10693       | predicted pseudogene 10693                                                                    |
| 9.7E-03 | -2.0 | Gm11950       | predicted gene 11950                                                                          |
| 1.2E-02 | -2.0 | Gpr68         | G protein-coupled receptor 68                                                                 |
| 1.9E-07 | -2.0 | S100a6        | S100 calcium binding protein A6 (calcylin)                                                    |
| 5.4E-03 | -2.0 | Gm17035       | predicted gene 17035                                                                          |



|         |      |               |                                                                                |
|---------|------|---------------|--------------------------------------------------------------------------------|
| 2.7E-04 | -2.0 | Eya4          | eyes absent 4 homolog (Drosophila)                                             |
| 7.4E-08 | -2.0 | Cdc42ep3      | CDC42 effector protein (Rho GTPase binding) 3                                  |
| 8.8E-08 | -1.9 | Tnip3         | TNFAIP3 interacting protein 3                                                  |
| 4.6E-04 | -1.9 | B430305J03Rik | RIKEN cDNA B430305J03 gene                                                     |
| 1.7E-06 | -1.9 | Dpep2         | dipeptidase 2                                                                  |
| 2.5E-03 | -1.9 | Irf7          | interferon regulatory factor 7                                                 |
| 2.0E-05 | -1.9 | Nedd4         | neural precursor cell expressed, developmentally down-regulated 4              |
| 4.0E-05 | -1.9 | Car5b         | carbonic anhydrase 5b, mitochondrial                                           |
| 6.9E-05 | -1.9 | Mcoln3        | mucolipin 3                                                                    |
| 1.5E-04 | -1.9 | H2-DMa        | histocompatibility 2, class II, locus DMA                                      |
| 2.0E-06 | -1.9 | Fscn1         | fascin homolog 1, actin bundling protein (Strongylocentrotus purpuratus)       |
| 1.9E-05 | -1.9 | Emp2          | epithelial membrane protein 2                                                  |
| 3.3E-08 | -1.9 | Lifr          | leukemia inhibitory factor receptor                                            |
| 8.6E-05 | -1.9 | Emr4          | EGF-like module containing, mucin-like, hormone receptor-like sequence 4       |
| 2.1E-05 | -1.9 | Gm14005       | predicted gene 14005                                                           |
| 2.8E-06 | -1.9 | Gp1ba         | glycoprotein 1b, alpha polypeptide                                             |
| 2.9E-08 | -1.9 | Gm14548       | predicted gene 14548                                                           |
| 3.3E-06 | -1.9 | Zranb3        | zinc finger, RAN-binding domain containing 3                                   |
| 4.4E-03 | -1.9 | Rac3          | RAS-related C3 botulinum substrate 3                                           |
| 4.6E-05 | -1.9 | Napsa         | napsin A aspartic peptidase                                                    |
| 1.2E-03 | -1.9 | Pira2         | paired-Ig-like receptor A2                                                     |
| 1.1E-04 | -1.9 | Myom1         | myomesin 1                                                                     |
| 4.1E-06 | -1.9 | Spsb1         | spla/ryanodine receptor domain and SOCS box containing 1                       |
| 3.3E-03 | -1.9 | Cacna1b       | calcium channel, voltage-dependent, N type, alpha 1B subunit                   |
| 4.6E-06 | -1.9 | Naaa          | N-acylethanolamine acid amidase                                                |
| 5.6E-03 | -1.9 | Prr15         | proline rich 15                                                                |
| 1.8E-05 | -1.9 | Gpr85         | G protein-coupled receptor 85                                                  |
| 2.8E-03 | -1.9 | Rtp4          | receptor transporter protein 4                                                 |
| 1.6E-02 | -1.9 | March3        | membrane-associated ring finger (C3HC4) 3                                      |
| 8.3E-03 | -1.9 | Ugt1a6a       | UDP glucuronosyltransferase 1 family, polypeptide A6A                          |
| 8.7E-06 | -1.8 | Entpd1        | ectonucleoside triphosphate diphosphohydrolase 1                               |
| 6.8E-06 | -1.8 | Lilra6        | leukocyte immunoglobulin-like receptor, subfamily A (with TM domain), member 6 |
| 5.3E-08 | -1.8 | S100a10       | S100 calcium binding protein A10 (calpactin)                                   |
| 3.1E-03 | -1.8 | Myo1d         | myosin ID                                                                      |
| 9.0E-04 | -1.8 | Gm12951       | predicted gene 12951                                                           |
| 1.3E-02 | -1.8 | Pcdhb21       | protocadherin beta 21                                                          |

|         |      |            |                                                             |
|---------|------|------------|-------------------------------------------------------------|
| 6.7E-06 | -1.8 | Fgf11      | fibroblast growth factor 11                                 |
| 4.3E-07 | -1.8 | Myo6       | myosin VI                                                   |
| 1.0E-06 | -1.8 | Aim1       | absent in melanoma 1                                        |
| 5.3E-03 | -1.8 | Lipg       | lipase, endothelial                                         |
| 8.9E-04 | -1.8 | Ahnak      | AHNAK nucleoprotein (desmoyokin)                            |
| 1.4E-04 | -1.8 | Gdpd5      | glycerophosphodiester phosphodiesterase domain containing 5 |
| 1.1E-06 | -1.8 | Fam84b     | family with sequence similarity 84, member B                |
| 4.1E-04 | -1.8 | Pigz       | phosphatidylinositol glycan anchor biosynthesis, class Z    |
| 7.3E-03 | -1.8 | Tmem190    | transmembrane protein 190                                   |
| 1.9E-07 | -1.8 | Ccrn4l     | CCR4 carbon catabolite repression 4-like (S. cerevisiae)    |
| 6.4E-06 | -1.8 | Thra       | thyroid hormone receptor alpha                              |
| 2.0E-03 | -1.8 | Ccr3       | chemokine (C-C motif) receptor 3                            |
| 1.3E-04 | -1.8 | P2ry14     | purinergic receptor P2Y, G-protein coupled, 14              |
| 1.8E-07 | -1.8 | Irf2bpl    | interferon regulatory factor 2 binding protein-like         |
| 9.2E-04 | -1.8 | Rpl31-ps18 | ribosomal protein L31, pseudogene 18                        |
| 8.8E-06 | -1.8 | Kdr        | kinase insert domain protein receptor                       |
| 1.1E-02 | -1.8 | AA474408   | expressed sequence AA474408                                 |
| 5.0E-03 | -1.8 | Maml1      | mastermind-like domain containing 1                         |
| 7.9E-05 | -1.8 | Casp4      | caspase 4, apoptosis-related cysteine peptidase             |
| 3.8E-03 | -1.8 | Dner       | delta/notch-like EGF-related receptor                       |
| 1.5E-06 | -1.8 | Fxyd2      | FXD domain-containing ion transport regulator 2             |
| 3.2E-05 | -1.8 | Clec5a     | C-type lectin domain family 5, member a                     |
| 4.1E-03 | -1.8 | Nr1d1      | nuclear receptor subfamily 1, group D, member 1             |
| 5.0E-03 | -1.8 | Cmpk2      | cytidine monophosphate (UMP-CMP) kinase 2, mitochondrial    |
| 1.7E-03 | -1.8 | Gm15922    | predicted gene 15922                                        |
| 1.0E-02 | -1.7 | Kif5a      | kinesin family member 5A                                    |
| 5.3E-03 | -1.7 | Hspa12b    | heat shock protein 12B                                      |
| 1.1E-05 | -1.7 | Ass1       | argininosuccinate synthetase 1                              |
| 4.3E-05 | -1.7 | Lsr        | lipolysis stimulated lipoprotein receptor                   |
| 1.4E-05 | -1.7 | Mgst3      | microsomal glutathione S-transferase 3                      |
| 1.6E-03 | -1.7 | AI427809   | expressed sequence AI427809                                 |
| 2.0E-06 | -1.7 | Sult1a1    | sulfotransferase family 1A, phenol-preferring, member 1     |
| 3.0E-05 | -1.7 | Map3k6     | mitogen-activated protein kinase kinase kinase 6            |
| 3.4E-03 | -1.7 | Ifi2712a   | interferon, alpha-inducible protein 27 like 2A              |
| 3.0E-04 | -1.7 | Tnfsf8     | tumor necrosis factor (ligand) superfamily, member 8        |
| 1.5E-03 | -1.7 | Rpl31-ps1  | ribosomal protein L31, pseudogene 1                         |
| 1.2E-05 | -1.7 | Frmd6      | FERM domain containing 6                                    |
| 3.8E-04 | -1.7 | Tm6sf1     | transmembrane 6 superfamily member 1                        |
| 2.7E-03 | -1.7 | Samd9l     | sterile alpha motif domain containing 9-like                |
| 1.0E-05 | -1.7 | Gbp9       | guanylate-binding protein 9                                 |

|         |      |           |                                                                         |
|---------|------|-----------|-------------------------------------------------------------------------|
| 1.1E-04 | -1.7 | Prdm1     | PR domain containing 1, with ZNF domain                                 |
| 1.9E-02 | -1.7 | Ank1      | ankyrin 1, erythroid                                                    |
| 6.1E-04 | -1.7 | Fkbp1b    | FK506 binding protein 1b                                                |
| 1.6E-04 | -1.7 | Sh2d1b1   | SH2 domain protein 1B1                                                  |
| 1.2E-02 | -1.7 | Fut7      | fucosyltransferase 7                                                    |
| 5.4E-07 | -1.7 | Spn       | sialophorin                                                             |
| 1.4E-05 | -1.7 | Slamf9    | SLAM family member 9                                                    |
| 1.8E-03 | -1.7 | Klf8      | Kruppel-like factor 8                                                   |
| 2.5E-05 | -1.7 | Arl4c     | ADP-ribosylation factor-like 4C                                         |
| 1.4E-05 | -1.7 | Gm5424    | predicted gene 5424                                                     |
| 2.7E-07 | -1.7 | Ctsk      | cathepsin K                                                             |
| 6.9E-04 | -1.7 | Slc24a3   | solute carrier family 24 (sodium/potassium/calcium exchanger), member 3 |
| 2.4E-03 | -1.7 | Gm10575   | predicted gene 10575                                                    |
| 2.1E-05 | -1.7 | Pdlim2    | PDZ and LIM domain 2                                                    |
| 3.3E-05 | -1.7 | Met       | met proto-oncogene                                                      |
| 1.2E-06 | -1.7 | Fgd3      | FYVE, RhoGEF and PH domain containing 3                                 |
| 3.1E-05 | -1.7 | Cd4       | CD4 antigen                                                             |
| 1.3E-02 | -1.7 | Ak7       | adenylate kinase 7                                                      |
| 8.9E-05 | -1.7 | Nqo1      | NAD(P)H dehydrogenase, quinone 1                                        |
| 1.6E-04 | -1.7 | Hist1h2bp | histone cluster 1, H2bp                                                 |
| 1.3E-02 | -1.7 | Gm10357   | predicted gene 10357                                                    |
| 3.1E-04 | -1.7 | Gm15931   | predicted gene 15931                                                    |
| 7.3E-04 | -1.7 | Fnbp1l    | formin binding protein 1-like                                           |
| 2.5E-09 | -1.6 | Emp1      | epithelial membrane protein 1                                           |
| 3.3E-05 | -1.6 | Bmf       | BCL2 modifying factor                                                   |
| 9.5E-04 | -1.6 | Stbd1     | starch binding domain 1                                                 |
| 8.4E-05 | -1.6 | Niacr1    | niacin receptor 1                                                       |
| 1.4E-06 | -1.6 | Calhm2    | calcium homeostasis modulator 2                                         |
| 6.4E-08 | -1.6 | Gsn       | gelsolin                                                                |
| 2.4E-04 | -1.6 | H2-DMb2   | histocompatibility 2, class II, locus Mb2                               |
| 1.7E-02 | -1.6 | Fah       | fumarylacetoacetate hydrolase                                           |
| 9.7E-04 | -1.6 | Trim2     | tripartite motif-containing 2                                           |
| 2.1E-03 | -1.6 | Slfn5     | schlafen 5                                                              |
| 3.9E-06 | -1.6 | Ube2l6    | ubiquitin-conjugating enzyme E2L 6                                      |
| 1.5E-02 | -1.6 | Gm7609    | predicted pseudogene 7609                                               |
| 4.5E-05 | -1.6 | Mfap3l    | microfibrillar-associated protein 3-like                                |
| 1.7E-04 | -1.6 | Hist1h2bk | histone cluster 1, H2bk                                                 |
| 2.1E-06 | -1.6 | Cxcl16    | chemokine (C-X-C motif) ligand 16                                       |
| 7.9E-06 | -1.6 | Gpr183    | G protein-coupled receptor 183                                          |
| 1.8E-04 | -1.6 | Rnase4    | ribonuclease, RNase A family 4                                          |
| 2.9E-03 | -1.6 | Stap1     | signal transducing adaptor family member 1                              |

|         |      |               |                                                                                                |
|---------|------|---------------|------------------------------------------------------------------------------------------------|
| 2.9E-09 | -1.6 | Anxa2         | annexin A2                                                                                     |
| 2.9E-04 | -1.6 | Arhgap27      | Rho GTPase activating protein 27                                                               |
| 3.7E-05 | -1.6 | N4bp3         | NEDD4 binding protein 3                                                                        |
| 6.7E-07 | -1.6 | Mfsd6         | major facilitator superfamily domain containing 6                                              |
| 8.2E-06 | -1.6 | Anxa1         | annexin A1                                                                                     |
| 1.5E-06 | -1.6 | Susd3         | sushi domain containing 3                                                                      |
| 2.7E-07 | -1.6 | Tsc22d3       | TSC22 domain family, member 3                                                                  |
| 4.2E-05 | -1.6 | Gm11709       | predicted gene 11709                                                                           |
| 8.7E-05 | -1.6 | Mical2        | microtubule associated monooxygenase, calponin and LIM domain containing 2                     |
| 1.9E-06 | -1.6 | Myo1g         | myosin IG                                                                                      |
| 2.0E-07 | -1.6 | Camkk2        | calcium/calmodulin-dependent protein kinase kinase 2, beta                                     |
| 1.9E-02 | -1.6 | Tsku          | tsukushi                                                                                       |
| 2.3E-04 | -1.6 | Slc22a15      | solute carrier family 22 (organic anion/cation transporter), member 15                         |
| 3.4E-05 | -1.6 | Gm11710       | predicted gene 11710                                                                           |
| 1.6E-05 | -1.6 | Mocos         | molybdenum cofactor sulfurase                                                                  |
| 1.9E-05 | -1.6 | Mllt4         | myeloid/lymphoid or mixed-lineage leukemia (trithorax homolog, Drosophila); translocated to, 4 |
| 1.2E-06 | -1.6 | Oit3          | oncoprotein induced transcript 3                                                               |
| 4.5E-08 | -1.6 | Esytl         | extended synaptotagmin-like protein 1                                                          |
| 1.7E-03 | -1.6 | Tmem37        | transmembrane protein 37                                                                       |
| 1.3E-04 | -1.6 | Ang           | angiogenin, ribonuclease, RNase A family, 5                                                    |
| 1.7E-02 | -1.6 | 9830001H06Rik | RIKEN cDNA 9830001H06 gene                                                                     |
| 3.6E-04 | -1.6 | Uchl1         | ubiquitin carboxy-terminal hydrolase L1                                                        |
| 1.9E-07 | -1.6 | Fam105a       | family with sequence similarity 105, member A                                                  |
| 1.1E-06 | -1.6 | Gent1         | glucosaminyl (N-acetyl) transferase 1, core 2                                                  |
| 8.8E-05 | -1.6 | Maml3         | mastermind like 3 (Drosophila)                                                                 |
| 5.9E-05 | -1.6 | Cd300lh       | CD300 antigen like family member H                                                             |
| 2.2E-05 | -1.6 | Plxdc1        | plexin domain containing 1                                                                     |
| 9.3E-04 | -1.6 | 2610034B18Rik | RIKEN cDNA 2610034B18 gene                                                                     |
| 3.7E-04 | -1.6 | Gnb4          | guanine nucleotide binding protein (G protein), beta 4                                         |
| 8.6E-03 | -1.6 | Gm7582        | predicted gene 7582                                                                            |
| 1.1E-06 | -1.6 | Sema6d        | sema domain, transmembrane domain (TM), and cytoplasmic domain, (semaphorin) 6D                |
| 2.3E-03 | -1.6 | Ramp1         | receptor (calcitonin) activity modifying protein 1                                             |
| 6.8E-03 | -1.6 | Gm15930       | predicted gene 15930                                                                           |
| 7.8E-05 | -1.6 | Ophn1         | oligophrenin 1                                                                                 |
| 4.5E-05 | -1.5 | Gm11711       | predicted gene 11711                                                                           |
| 1.1E-05 | -1.5 | Icam1         | intercellular adhesion molecule 1                                                              |
| 9.0E-03 | -1.5 | Hist1h2bn     | histone cluster 1, H2bn                                                                        |

|         |      |         |                                                                                           |
|---------|------|---------|-------------------------------------------------------------------------------------------|
| 1.6E-07 | -1.5 | Fam129b | family with sequence similarity 129, member B                                             |
| 3.4E-04 | -1.5 | Oas1g   | 2'-5' oligoadenylate synthetase 1G                                                        |
| 2.2E-06 | -1.5 | Lpl     | lipoprotein lipase                                                                        |
| 1.5E-02 | -1.5 | Fam151a | family with sequence simliarity 151, member A                                             |
| 1.1E-07 | -1.5 | Coro1a  | coronin, actin binding protein 1A                                                         |
| 1.9E-03 | -1.5 | Tle1    | transducin-like enhancer of split 1, homolog of Drosophila E(spl)                         |
| 1.7E-04 | -1.5 | Sncaip  | synuclein, alpha interacting protein (synphilin)                                          |
| 3.7E-06 | -1.5 | Smcr7   | Smith-Magenis syndrome chromosome region, candidate 7 homolog (human)                     |
| 1.2E-05 | -1.5 | Fcgr1   | Fc receptor, IgG, high affinity I                                                         |
| 7.5E-05 | -1.5 | Dfna5   | deafness, autosomal dominant 5 (human)                                                    |
| 1.9E-06 | -1.5 | Gm5431  | predicted gene 5431                                                                       |
| 8.6E-05 | -1.5 | Emr1    | EGF-like module containing, mucin-like, hormone receptor-like sequence 1                  |
| 1.3E-02 | -1.5 | Gpr176  | G protein-coupled receptor 176                                                            |
| 1.1E-03 | -1.5 | Dock4   | dedicator of cytokinesis 4                                                                |
| 1.0E-06 | -1.5 | Plp2    | proteolipid protein 2                                                                     |
| 1.9E-07 | -1.5 | Myadm   | myeloid-associated differentiation marker                                                 |
| 4.0E-06 | -1.5 | Irgm2   | immunity-related GTPase family M member 2                                                 |
| 5.3E-06 | -1.5 | Kcnj2   | potassium inwardly-rectifying channel, subfamily J, member 2                              |
| 1.5E-08 | -1.5 | Il1rn   | interleukin 1 receptor antagonist                                                         |
| 4.2E-06 | -1.5 | Il4i1   | interleukin 4 induced 1                                                                   |
| 5.3E-06 | -1.5 | Gm6169  | predicted gene 6169                                                                       |
| 2.7E-04 | -1.5 | Gm13669 | predicted gene 13669                                                                      |
| 9.3E-06 | -1.5 | Nfam1   | Nfat activating molecule with ITAM motif 1                                                |
| 4.5E-05 | -1.5 | Pik3ap1 | phosphoinositide-3-kinase adaptor protein 1                                               |
| 5.7E-03 | -1.5 | Gm15518 | predicted gene 15518                                                                      |
| 1.3E-07 | -1.5 | Kcnn4   | potassium intermediate/small conductance calcium-activated channel, subfamily N, member 4 |
| 1.7E-02 | -1.5 | Spata25 | spermatogenesis associated 25                                                             |
| 1.8E-02 | -1.5 | Gm15448 | predicted gene 15448                                                                      |
| 1.2E-06 | -1.5 | Rapgef5 | Rap guanine nucleotide exchange factor (GEF) 5                                            |
| 1.2E-05 | -1.5 | Tmem178 | transmembrane protein 178                                                                 |
| 2.0E-04 | -1.5 | Dhx58   | DEXH (Asp-Glu-X-His) box polypeptide 58                                                   |
| 9.3E-07 | -1.5 | Slc46a3 | solute carrier family 46, member 3                                                        |

**Supplementary Table S3.** List of the 30 most strongly enriched Gene Ontology Biological process terms among the 357 transcripts that were upregulated in the 48h DHR-treated BMDMs compared to the DMSO-treated ones. False Discovery Rate value was calculated by Benjamini-Hochberg procedure for multiple test correction (FDR < 0.05). Strength: Log10(observed gene count / expected gene count).

| <b>term ID</b> | <b>term description</b>                                 | <b>observed<br/>gene count</b> | <b>background<br/>gene count</b> | <b>strength</b> | <b>FDR</b> |
|----------------|---------------------------------------------------------|--------------------------------|----------------------------------|-----------------|------------|
| GO:0010749     | Regulation of nitric oxide mediated signal transduction | 3                              | 11                               | 1.28            | 4.6E-02    |
| GO:0048799     | Animal organ maturation                                 | 4                              | 22                               | 1.1             | 2.8E-02    |
| GO:0030201     | Heparan sulfate proteoglycan metabolic process          | 4                              | 25                               | 1.05            | 3.8E-02    |
| GO:0034104     | Negative regulation of tissue remodeling                | 4                              | 27                               | 1.02            | 4.6E-02    |
| GO:0045780     | Positive regulation of bone resorption                  | 4                              | 27                               | 1.02            | 4.6E-02    |
| GO:0033198     | Response to atp                                         | 5                              | 35                               | 1               | 1.7E-02    |
| GO:1900745     | Positive regulation of p38mapk cascade                  | 4                              | 28                               | 1               | 5.0E-02    |
| GO:0045124     | Regulation of bone resorption                           | 7                              | 52                               | 0.97            | 2.4E-03    |
| GO:0048873     | Homeostasis of number of cells within a tissue          | 5                              | 38                               | 0.96            | 2.2E-02    |
| GO:0060122     | Inner ear receptor cell stereocilium organization       | 5                              | 40                               | 0.94            | 2.6E-02    |
| GO:0043277     | Apoptotic cell clearance                                | 5                              | 42                               | 0.92            | 3.0E-02    |
| GO:0007266     | Rho protein signal transduction                         | 6                              | 54                               | 0.89            | 1.5E-02    |
| GO:0090303     | Positive regulation of wound healing                    | 6                              | 56                               | 0.88            | 1.7E-02    |
| GO:1903036     | Positive regulation of response to wounding             | 7                              | 74                               | 0.82            | 1.2E-02    |
| GO:0034103     | Regulation of tissue remodeling                         | 8                              | 87                               | 0.81            | 6.2E-03    |
| GO:0060563     | Neuroepithelial cell differentiation                    | 6                              | 65                               | 0.81            | 3.0E-02    |
| GO:1990869     | Cellular response to chemokine                          | 7                              | 82                               | 0.78            | 1.9E-02    |
| GO:0060976     | Coronary vasculature development                        | 6                              | 71                               | 0.77            | 4.1E-02    |
| GO:0070098     | Chemokine-mediated signaling pathway                    | 6                              | 71                               | 0.77            | 4.1E-02    |
| GO:0001657     | Ureteric bud development                                | 8                              | 97                               | 0.76            | 1.1E-02    |
| GO:0030595     | Leukocyte chemotaxis                                    | 10                             | 125                              | 0.75            | 2.7E-03    |
| GO:0019229     | Regulation of vasoconstriction                          | 6                              | 75                               | 0.75            | 4.9E-02    |
| GO:0006909     | Phagocytosis                                            | 11                             | 144                              | 0.73            | 1.9E-03    |
| GO:0072073     | Kidney epithelium development                           | 11                             | 146                              | 0.72            | 2.0E-03    |
| GO:0060993     | Kidney morphogenesis                                    | 7                              | 93                               | 0.72            | 3.1E-02    |
| GO:0008360     | Regulation of cell shape                                | 11                             | 151                              | 0.71            | 2.5E-03    |
| GO:0097529     | Myeloid leukocyte migration                             | 8                              | 113                              | 0.7             | 2.2E-02    |
| GO:0002690     | Positive regulation of leukocyte chemotaxis             | 7                              | 97                               | 0.7             | 3.8E-02    |

|            |                                                   |   |    |     |         |
|------------|---------------------------------------------------|---|----|-----|---------|
| GO:0120162 | Positive regulation of cold-induced thermogenesis | 7 | 97 | 0.7 | 3.8E-02 |
| GO:2000106 | Regulation of leukocyte apoptotic process         | 7 | 98 | 0.7 | 3.9E-02 |

**Supplementary Table S4.** List of 102 differently expressed transcripts between 2h DMSO- or 2h DHR (1  $\mu$ M)-treated 4 day-differentiated monocytes (based on at least 1.5-fold change and corrected p value<0.05).

| Corr. p val. | FC   | Gene symbol   | Gene title                                                     |
|--------------|------|---------------|----------------------------------------------------------------|
| 1.8E-08      | 39.4 | Hic1          | hypermethylated in cancer 1                                    |
| 1.2E-06      | 30.4 | Camkk1        | calcium/calmodulin-dependent protein kinase kinase 1, alpha    |
| 3.2E-06      | 9.7  | Art2a-ps      | ADP-ribosyltransferase 2a, pseudogene                          |
| 8.9E-08      | 8.8  | Bmp2          | bone morphogenetic protein 2                                   |
| 7.1E-06      | 6.9  | Rarb          | retinoic acid receptor, beta                                   |
| 2.1E-05      | 6.3  | B230378P21Rik | RIKEN cDNA B230378P21 gene                                     |
| 1.6E-03      | 5.2  | Fam20a        | family with sequence similarity 20, member A                   |
| 2.3E-05      | 4.9  | Gm11464       | predicted gene 11464                                           |
| 1.4E-02      | 3.8  | Cxcl9         | chemokine (C-X-C motif) ligand 9                               |
| 4.3E-05      | 3.8  | Kcnip3        | Kv channel interacting protein 3, calsenilin                   |
| 1.4E-03      | 3.7  | Kcnf1         | potassium voltage-gated channel, subfamily F, member 1         |
| 9.1E-07      | 3.7  | Vegfa         | vascular endothelial growth factor A                           |
| 1.0E-02      | 3.5  | Pcdhb16       | protocadherin beta 16                                          |
| 4.9E-08      | 3.4  | Pram1         | PML-RAR alpha-regulated adaptor molecule 1                     |
| 6.1E-03      | 3.4  | AI848285      | expressed sequence AI848285                                    |
| 8.6E-05      | 3.3  | Hbegf         | heparin-binding EGF-like growth factor                         |
| 2.1E-07      | 3.3  | Hivep2        | human immunodeficiency virus type I enhancer binding protein 2 |
| 3.5E-04      | 3.2  | Kif26b        | kinesin family member 26B                                      |
| 3.4E-03      | 3.0  | Rpsa-ps3      | ribosomal protein SA, pseudogene 3                             |
| 5.2E-03      | 3.0  | Wnk2          | WNK lysine deficient protein kinase 2                          |
| 1.0E-07      | 3.0  | Smad3         | SMAD family member 3                                           |
| 2.8E-05      | 2.9  | Tox3          | TOX high mobility group box family member 3                    |
| 1.2E-03      | 2.9  | AI593442      | expressed sequence AI593442                                    |
| 2.9E-04      | 2.9  | Il2rb         | interleukin 2 receptor, beta chain                             |
| 8.3E-03      | 2.8  | Rab30         | RAB30, member RAS oncogene family                              |
| 1.4E-02      | 2.7  | Gm10430       | predicted gene 10430                                           |
| 6.9E-07      | 2.7  | Il21r         | interleukin 21 receptor                                        |
| 3.6E-03      | 2.7  | Pou3f1        | POU domain, class 3, transcription factor 1                    |
| 1.3E-07      | 2.6  | Rab20         | RAB20, member RAS oncogene family                              |
| 1.3E-10      | 2.5  | Ptgs1         | prostaglandin-endoperoxide synthase 1                          |

|         |     |               |                                                                          |
|---------|-----|---------------|--------------------------------------------------------------------------|
| 1.9E-04 | 2.5 | 5031425F14Rik | RIKEN cDNA 5031425F14 gene                                               |
| 5.8E-03 | 2.4 | SNORA40       | Small nucleolar RNA SNORA40                                              |
| 8.8E-09 | 2.4 | Dtx4          | deltex 4 homolog (Drosophila)                                            |
| 2.6E-09 | 2.3 | 2510009E07Rik | RIKEN cDNA 2510009E07 gene                                               |
| 6.5E-08 | 2.3 | Osgin1        | oxidative stress induced growth inhibitor 1                              |
| 8.3E-04 | 2.3 | Tubb3         | tubulin, beta 3 class III                                                |
| 1.3E-02 | 2.2 | Gm4784        | predicted gene 4784                                                      |
| 1.4E-04 | 2.2 | Mex3b         | mex3 homolog B (C. elegans)                                              |
| 1.6E-07 | 2.2 | Cd38          | CD38 antigen                                                             |
| 1.1E-09 | 2.2 | Mcart1        | mitochondrial carrier triple repeat 1                                    |
| 6.0E-05 | 2.1 | Hist1h3a      | histone cluster 1, H3a                                                   |
| 4.5E-08 | 2.1 | Fam117a       | family with sequence similarity 117, member A                            |
| 2.0E-07 | 2.0 | Gm13431       | predicted gene 13431                                                     |
| 1.4E-05 | 2.0 | Hrh1          | histamine receptor H1                                                    |
| 2.0E-06 | 2.0 | Socs2         | suppressor of cytokine signaling 2                                       |
| 6.4E-06 | 2.0 | Ddc           | dopa decarboxylase                                                       |
| 6.9E-08 | 2.0 | Neurl3        | neuralized homolog 3 homolog (Drosophila)                                |
| 2.5E-06 | 2.0 | Gm22          | predicted gene 22                                                        |
| 3.1E-04 | 2.0 | Gpr182        | G protein-coupled receptor 182                                           |
| 9.8E-07 | 2.0 | Klhl12        | kelch-like 12 (Drosophila)                                               |
| 5.9E-05 | 1.9 | Shcbp11       | Shc SH2-domain binding protein 1-like                                    |
| 6.8E-07 | 1.9 | Gadd45a       | growth arrest and DNA-damage-inducible 45 alpha                          |
| 1.3E-06 | 1.9 | BC005764      | cDNA sequence BC005764                                                   |
| 3.6E-04 | 1.9 | Gdf15         | growth differentiation factor 15                                         |
| 1.3E-05 | 1.9 | AA467197      | expressed sequence AA467197                                              |
| 1.0E-02 | 1.9 | Kbtbd11       | kelch repeat and BTB (POZ) domain containing 11                          |
| 8.1E-04 | 1.9 | Hmcn1         | hemicentin 1                                                             |
| 1.2E-05 | 1.9 | Enc1          | ectodermal-neural cortex 1                                               |
| 2.5E-07 | 1.9 | Mafb          | v-maf musculoaponeurotic fibrosarcoma oncogene family, protein B (avian) |
| 5.4E-07 | 1.8 | Gda           | guanine deaminase                                                        |
| 8.7E-04 | 1.8 | Xpnpep2       | X-prolyl aminopeptidase (aminopeptidase P) 2, membrane-bound             |
| 2.1E-06 | 1.8 | Dchs1         | dachsous 1 (Drosophila)                                                  |
| 3.9E-04 | 1.8 | Vdr           | vitamin D receptor                                                       |
| 1.6E-03 | 1.7 | AI427809      | expressed sequence AI427809                                              |
| 9.7E-03 | 1.7 | E230016M11Rik | RIKEN cDNA E230016M11 gene                                               |
| 1.8E-08 | 1.7 | Dusp5         | dual specificity phosphatase 5                                           |
| 4.9E-08 | 1.7 | Fam20c        | family with sequence similarity 20, member C                             |
| 1.5E-05 | 1.7 | Gm6659        | predicted gene 6659                                                      |
| 1.4E-07 | 1.7 | Ednrb         | endothelin receptor type B                                               |
| 9.4E-08 | 1.7 | Nrip1         | nuclear receptor interacting protein 1                                   |



|         |     |         |                                                               |
|---------|-----|---------|---------------------------------------------------------------|
| 8.9E-08 | 1.7 | Tagap   | T cell activation Rho GTPase activating protein               |
| 1.0E-04 | 1.7 | Tecpr2  | tectonin beta-propeller repeat containing 2                   |
| 2.1E-07 | 1.6 | Ikbke   | inhibitor of kappaB kinase epsilon                            |
| 1.2E-04 | 1.6 | Adap2   | ArfGAP with dual PH domains 2                                 |
| 1.2E-04 | 1.6 | Vangl2  | vang-like 2 (van gogh, Drosophila)                            |
| 7.5E-07 | 1.6 | Neil2   | nei like 2 (E. coli)                                          |
| 3.9E-09 | 1.6 | Gm20507 | predicted gene 20507                                          |
| 2.0E-07 | 1.6 | Bcl3    | B cell leukemia/lymphoma 3                                    |
| 4.1E-06 | 1.6 | Irf2bp2 | interferon regulatory factor 2 binding protein 2              |
| 7.9E-05 | 1.6 | Zfp759  | zinc finger protein 759                                       |
| 1.2E-02 | 1.6 | Gm16240 | predicted gene 16240                                          |
| 5.3E-05 | 1.6 | Fbxo32  | F-box protein 32                                              |
| 1.4E-06 | 1.6 | Cmah    | cytidine monophospho-N-acetylneuraminic acid hydroxylase      |
| 1.4E-06 | 1.6 | Cd97    | CD97 antigen                                                  |
| 1.6E-07 | 1.6 | Lfng    | LFNG O-fucosylpeptide 3-beta-N-acetylglucosaminyltransferase  |
| 3.6E-07 | 1.6 | Plk2    | polo-like kinase 2                                            |
| 1.9E-07 | 1.6 | Hcfc2   | host cell factor C2                                           |
| 5.2E-06 | 1.6 | Sox4    | SRY-box containing gene 4                                     |
| 4.0E-06 | 1.5 | Ccr12   | chemokine (C-C motif) receptor-like 2                         |
| 2.0E-05 | 1.5 | Arrdc3  | arrestin domain containing 3                                  |
| 4.2E-06 | 1.5 | Aifm2   | apoptosis-inducing factor, mitochondrion-associated 2         |
| 1.8E-06 | 1.5 | Spsb4   | spla/ryanodine receptor domain and SOCS box containing 4      |
| 2.5E-06 | 1.5 | Ndst1   | N-deacetylase/N-sulfotransferase (heparan glucosaminyl) 1     |
| 1.6E-05 | 1.5 | B3gnt7  | UDP-GlcNAc:betaGal beta-1,3-N-acetylglucosaminyltransferase 7 |
| 2.6E-06 | 1.5 | Zfp503  | zinc finger protein 503                                       |
| 1.5E-07 | 1.5 | Hs6st1  | heparan sulfate 6-O-sulfotransferase 1                        |
| 2.0E-06 | 1.5 | Ptafr   | platelet-activating factor receptor                           |
| 6.2E-08 | 1.5 | Tgm2    | transglutaminase 2, C polypeptide                             |
| 7.2E-07 | 1.5 | Mt2     | metallothionein 2                                             |
| 2.0E-08 | 1.5 | Phf15   | PHD finger protein 15                                         |
| 1.7E-05 | 1.5 | Fem1c   | fem-1 homolog c (C.elegans)                                   |
| 3.2E-06 | 1.5 | Slco2b1 | solute carrier organic anion transporter family, member 2b1   |
